# Supplementary material for: Transcriptome-microRNA analysis of Sarcoptes scabiei and host immune response
Source: PLoS One. 2017 May 23;12(5):e0177733. doi: 10.1371/journal.pone.0177733 (PMC5441584; doi:10.1371/journal.pone.0177733)
Supplement: S9 Table — A) Euroglyphus mayne allergen homologous unigenes; B) Dermatophagoides pteronyssinu allergen homologous unigenes (Only 20 of them are listed); C) Dermatophagoides farinae allergen homologous unigenes (Only 20 of them are listed). (DOCX) [file pone.0177733.s012.docx]

**S9A Table *Euroglyphus mayne* allergen homologous unigenes**

| **Unigenes** | **Subject** | **Description** |
| --- | --- | --- |
| comp31167_c0_seq1 | gi|14424447|sp|P25780.2|PEPT1_EURMA | RecName: Full=Peptidase 1;  AltName: Full=Allergen Eur m I;  AltName: Full=Mite group 1 allergen  Eur m 1; AltName: Allergen=Eur m 1;  Flags: Precursor |
| comp25459_c1_seq1 | gi|14424447|sp|P25780.2|PEPT1_EURMA |
| comp27545_c0_seq1 | gi|14424447|sp|P25780.2|PEPT1_EURMA |
| comp3310_c0_seq1 | gi|14424447|sp|P25780.2|PEPT1_EURMA |
| comp24210_c0_seq1 | gi|14424447|sp|P25780.2|PEPT1_EURMA |
| comp30024_c1_seq3 | gi|14424447|sp|P25780.2|PEPT1_EURMA |
| comp8468_c0_seq1 | gi|14424447|sp|P25780.2|PEPT1_EURMA |
| comp30024_c1_seq1 | gi|14424447|sp|P25780.2|PEPT1_EURMA |
| comp31660_c0_seq1 | gi|14424447|sp|P25780.2|PEPT1_EURMA |
| comp3666_c0_seq1 | gi|14424447|sp|P25780.2|PEPT1_EURMA |
| comp39153_c0_seq1 | gi|14424447|sp|P25780.2|PEPT1_EURMA |
| comp30177_c3_seq1 | gi|4377538|emb|CAA42677.1| | putative cysteine protease, partial [Euroglyphus maynei] |
| comp14662_c0_seq1 | gi|4377538|emb|CAA42677.1| |
| comp31091_c0_seq1 | gi|4377538|emb|CAA42677.1| |
| comp15227_c0_seq1 | gi|5059164|gb|AAD38943.1|AF144061_1 | alpha-amylase precursor [Euroglyphus maynei] |
| comp32824_c0_seq1 | gi|4377538|emb|CAA42677.1| | putative cysteine protease, partial [Euroglyphus maynei] |
| comp19184_c1_seq1 | gi|14423649|sp|Q9TZZ2.2|ALL2_EURMA | RecName: Full=Mite group 2 allergen Eur m 2; AltName: Allergen=Eur m 2; Flags: Precursor |

**S9B Table *Dermatophagoides* pteronyssinu allergen homologous unigenes** (Only 20 of them are listed）

| **Unigenes** | **Subject** | **Description** |
| --- | --- | --- |
| comp20965_c0_seq1 | gi|37778944|gb|AAO73464.1| | HDM allergen [Dermatophagoides pteronyssinus] |
| comp30568_c0_seq1 | gi|20385544|gb|AAM21322.1|AF373221_1 | group 14 allergen protein, partial [Dermatophagoides pteronyssinus] |
| comp38618_c0_seq1 | gi|31745576|gb|AAP57077.1| | trypsin-like serine protease [Dermatophagoides pteronyssinus] |
| comp3745_c0_seq1 | gi|156124992|gb|ABU50814.1| | Der p 3 allergen [Dermatophagoides pteronyssinus] |
| comp15813_c0_seq1 | gi|60920912|gb|AAX37328.1| | glutathione transferase delta-like Dp7018E11 [Dermatophagoides pteronyssinus] |
| comp27505_c1_seq2 | gi|67975089|gb|AAY84565.1| | group 15 allergen protein short isoform [Dermatophagoides pteronyssinus] |
| comp23447_c0_seq1 | gi|208970286|gb|ACI32128.1| | tropomyosin [Dermatophagoides pteronyssinus] |
| comp25339_c0_seq1 | gi|1170095|sp|P46419.1|GSTM1_DERPT | RecName: Full=Glutathione S-transferase; AltName: Full=GST class-mu; AltName: Full=Major allergen Der p 8; AltName: Full=P dp 15; AltName: Allergen=Der p 8 |
| comp26094_c0_seq1 | gi|60920878|gb|AAX37326.1| | glutathione transferase mu class Dp7019C10 [Dermatophagoides pteronyssinus] |
| comp8195_c0_seq1 | gi|60920912|gb|AAX37328.1| | glutathione transferase delta-like Dp7018E11 [Dermatophagoides pteronyssinus] |
| comp29331_c0_seq4 | gi|188485735|gb|ACD50950.1| | Der p 20 allergen [Dermatophagoides pteronyssinus] |
| comp22266_c0_seq1 | gi|20385544|gb|AAM21322.1|AF373221_1 | group 14 allergen protein, partial [Dermatophagoides pteronyssinus] |
| comp25210_c0_seq1 | gi|156124992|gb|ABU50814.1| | Der p 3 allergen [Dermatophagoides pteronyssinus] |
| comp19417_c0_seq1 | gi|156124992|gb|ABU50814.1| | Der p 3 allergen [Dermatophagoides pteronyssinus] |
| comp24455_c0_seq1 | gi|721683625|gb|AIX10299.1| | ribosomal protein S4, partial [Dermatophagoides pteronyssinus] |
| comp33849_c0_seq1 | gi|1170095|sp|P46419.1|GSTM1_DERPT | RecName: Full=Glutathione S-transferase; AltName: Full=GST class-mu; AltName: Full=Major allergen Der p 8; AltName: Full=P dp 15; AltName: Allergen=Der p 8 |
| comp28043_c0_seq1 | gi|156124992|gb|ABU50814.1| | Der p 3 allergen [Dermatophagoides pteronyssinus] |
| comp28043_c0_seq1 | gi|156124992|gb|ABU50814.1| | Der p 3 allergen [Dermatophagoides pteronyssinus] |
| comp10963_c0_seq1 | gi|156124992|gb|ABU50814.1| | Der p 3 allergen [Dermatophagoides pteronyssinus] |
| comp19651_c1_seq1 | gi|157696052|gb|ABV66255.1| | Der p 1 allergen, partial [Dermatophagoides pteronyssinus] |

**S9C Table *Dermatophagoides farinae* allergen homologous unigenes** (Only 20 of them are listed）

| **Unigenes** | **Subject** | **Description** |
| --- | --- | --- |
| comp29126_c0_seq4 | gi|685432804|gb|AIO08856.1| | Der f 26 allergen [Dermatophagoides farinae] |
| comp22674_c0_seq1 | gi|442565878|gb|AGC56219.1| | ferritin [Dermatophagoides farinae] |
| comp30803_c0_seq3 | gi|685432828|gb|AIO08868.1| | Ves m 1-like allergen [Dermatophagoides farinae] |
| comp36468_c0_seq1 | gi|685432794|gb|AIO08851.1| | Der f 27 allergen [Dermatophagoides farinae] |
| comp19292_c1_seq1 | gi|37958173|gb|AAP35081.1| | Der f Alt a 10 allergen [Dermatophagoides farinae] |
| comp29201_c1_seq1 | gi|685432794|gb|AIO08851.1| | Der f 27 allergen [Dermatophagoides farinae] |
| comp12932_c0_seq1 | gi|387178006|gb|AFJ68066.1| | Der f 1 variant, partial [Dermatophagoides farinae] |
| comp30414_c10_seq1 | gi|685432804|gb|AIO08856.1| | Der f 26 allergen [Dermatophagoides farinae] |
| comp27139_c0_seq3 | gi|305387429|gb|ADM52184.1| | Der f 1 allergen, partial [Dermatophagoides farinae] |
| comp12998_c0_seq1 | gi|685432788|gb|AIO08848.1| | Der f 28 allergen [Dermatophagoides farinae] |
| comp27183_c3_seq1 | gi|371927457|pdb|3RVV|A | Chain A, Crystal Structure Of Der F 1 Complexed With Fab 4c1 |
| comp7078_c1_seq1 | gi|685432828|gb|AIO08868.1| | Ves m 1-like allergen [Dermatophagoides farinae] |
| comp22512_c1_seq1 | gi|442565874|gb|AGC56217.1| | translation elongation factor 2, partial [Dermatophagoides farinae] |
| comp30992_c0_seq1 | gi|37785882|gb|AAP57093.1| | DFP2 [Dermatophagoides farinae] |
| comp22203_c0_seq1 | gi|218203820|gb|ACK76293.1| | Der f 3 allergen [Dermatophagoides farinae] |
| comp27245_c1_seq1 | gi|37958173|gb|AAP35081.1| | Der f Alt a 10 allergen [Dermatophagoides farinae] |
| comp29593_c1_seq1 | gi|27550039|gb|AAM19082.1| | 60 kDa allergen Der f 18p [Dermatophagoides farinae] |
| comp29294_c1_seq1 | gi|37785882|gb|AAP57093.1| | DFP2 [Dermatophagoides farinae] |
| comp27000_c2_seq1 | gi|37958175|gb|AAP35082.1| | Der f Gal d 2 allergen [Dermatophagoides farinae] |
| comp30771_c2_seq1 | gi|1314736|gb|AAA99805.1| | Der f 3 mite allergen, partial [Dermatophagoides farinae] |
